# Supplementary material
Source: PubMed Central journal article supplement (PMC2846630)
Supplement: NIHMS171223-supplement-01.pdf [file NIHMS171223-supplement-01.pdf]

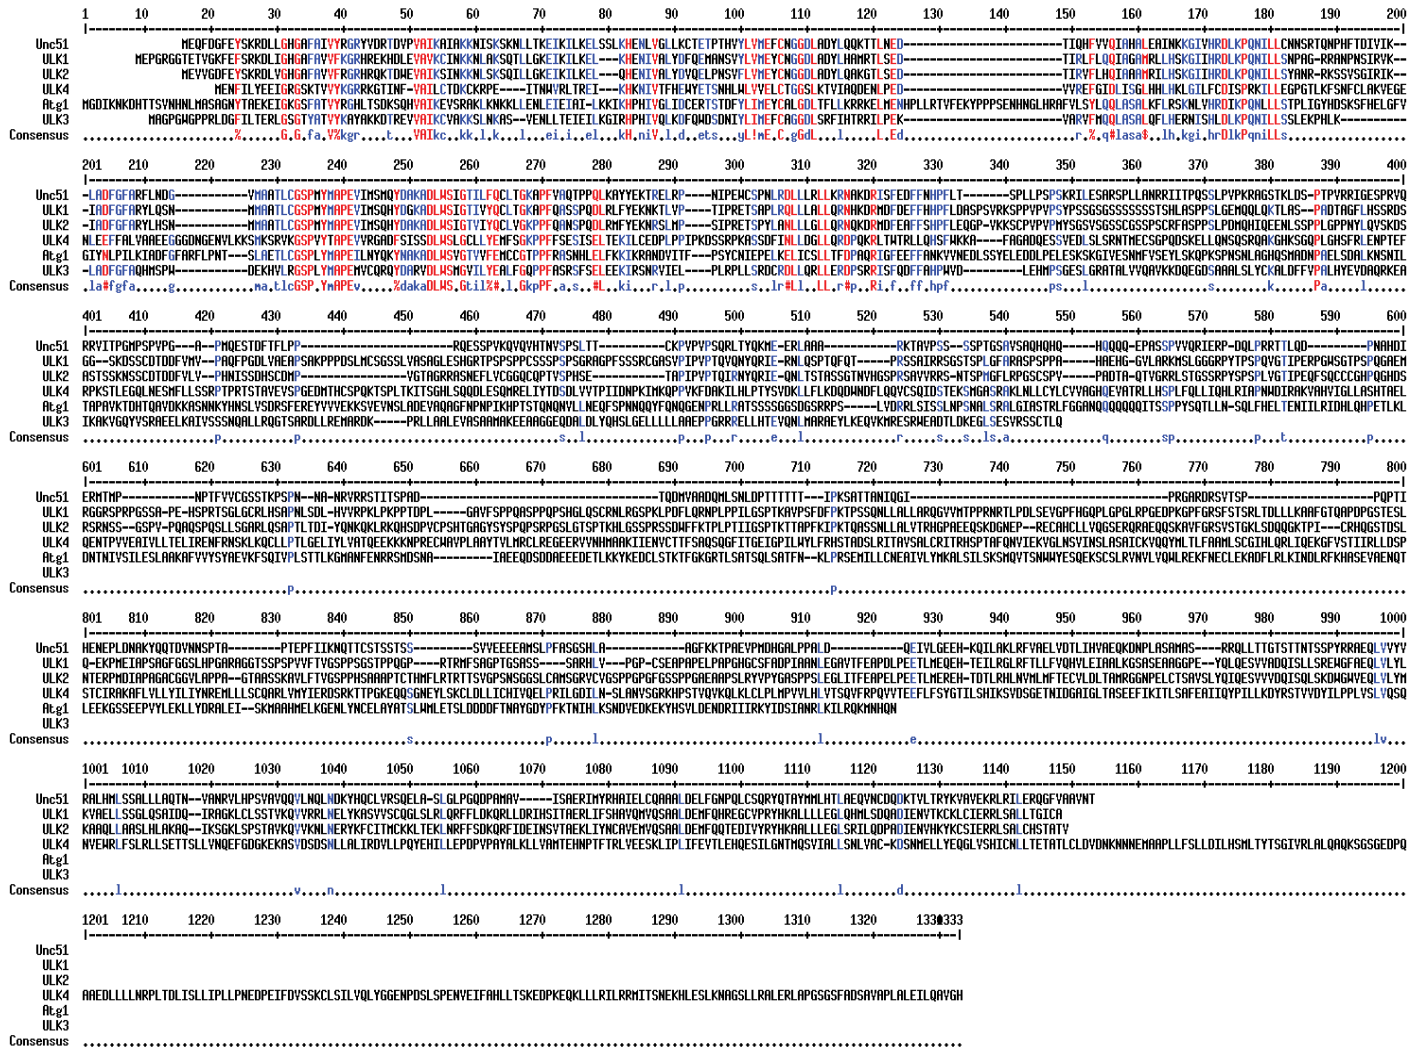

**Supplemental Figure 1.** Alignment of the amino acid sequences of Atg1 homologues from yeast, *C. elegans*, and homo sapiens (ULK1, ULK2, ULK3 and ULK4). The software Multalin (F. Corpet (1988). Nucl. Acids Res., 16 (22), 10881-10890) was used.
